# Supplementary figures and images for: Testing White’s Floristic Impoverishment Hypothesis in the Forest-Savanna Transition Zones of Africa
Source: Preprints.org preprint supplement (doi:10.20944/preprints202305.0206.v1), 2023-05-04

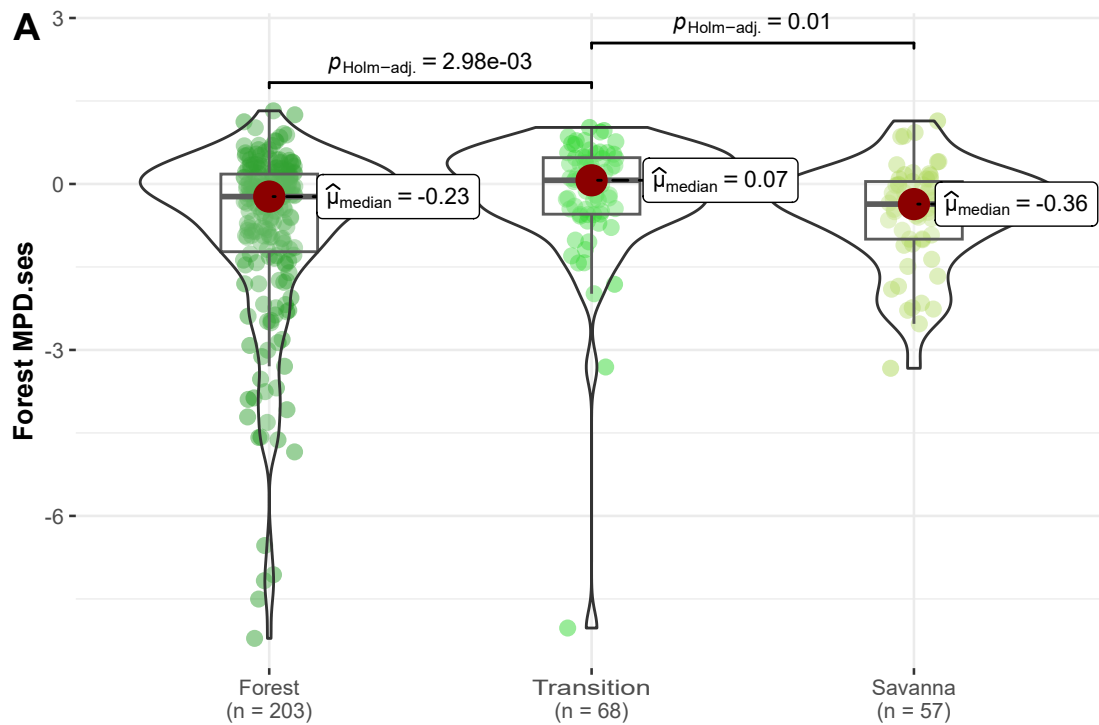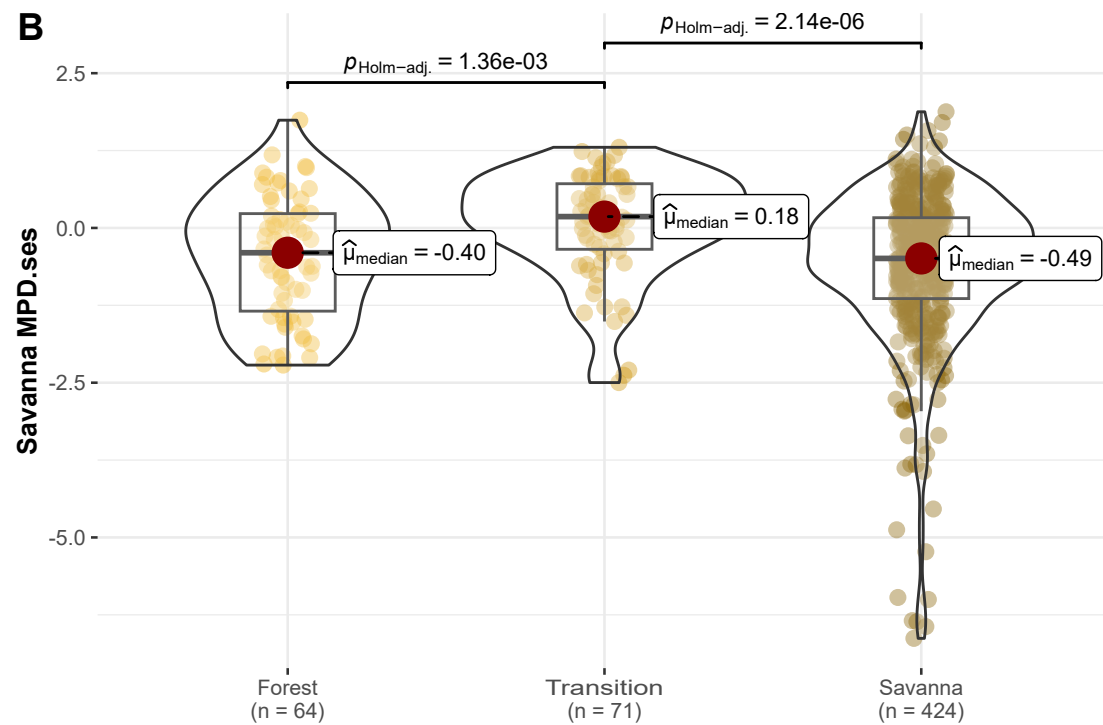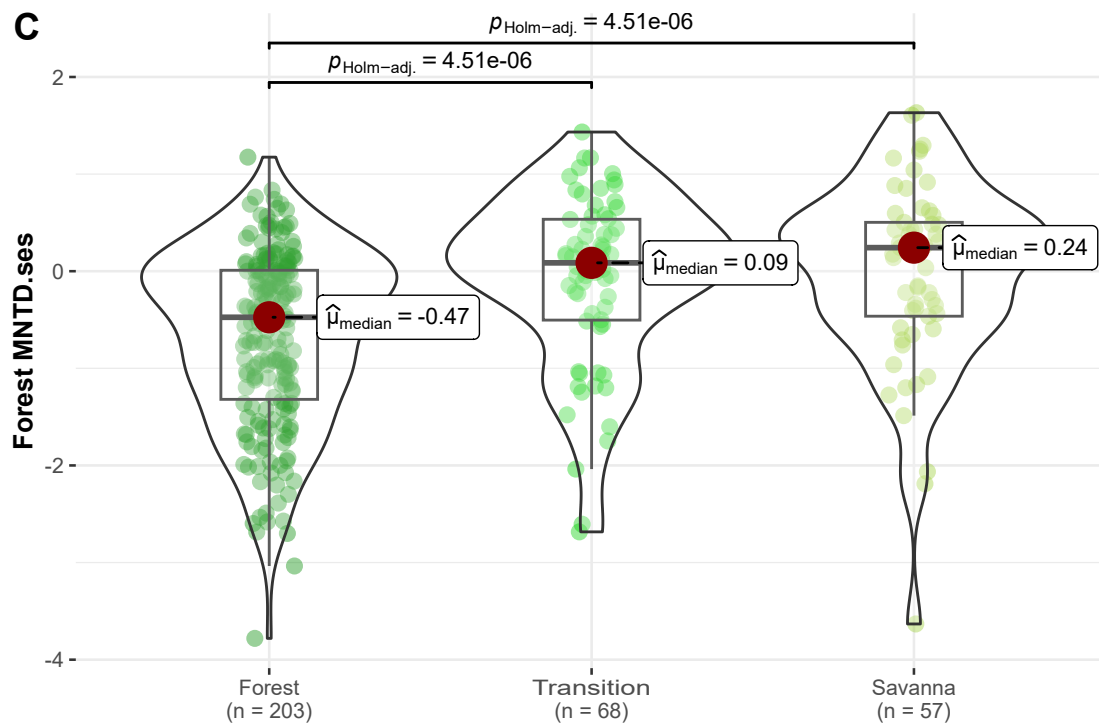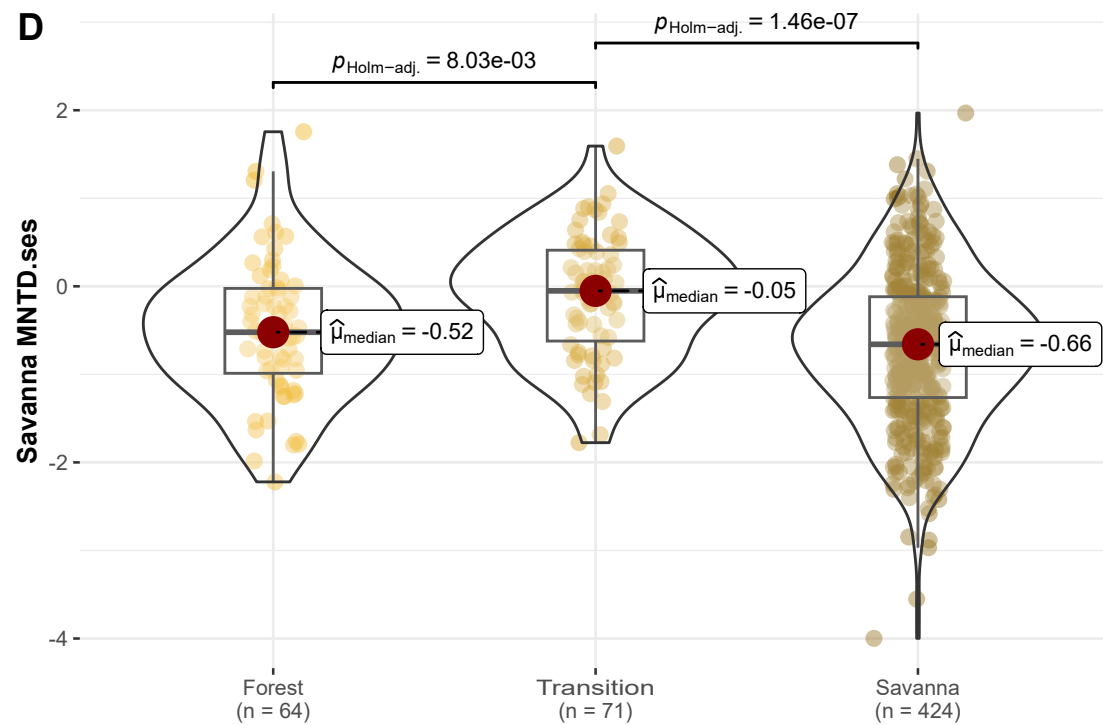

Supplement: Supplementary file 1 [file supplementary]
